# Supplementary material
Source: MDPI journal article supplement (https://www.mdpi.com/1424-2818/15/2/273)
Supplement: s1 [file s1]

**Table S1. Spearman's rank correlation coefficients ( $r_s$ ) between the dinoflagellate concentrations and the environmental variables obtained at Sfax and Carthage sites. Values in bold correspond to significant correlations ( $P < 0.05$ ).**

| Variables                          | <i>Alexandrium<br/>minutum</i><br>(cells/L) | <i>Gymnodinium<br/>impudicum</i><br>(cells/L) |
|------------------------------------|---------------------------------------------|-----------------------------------------------|
| Temperature (°C)                   | -0.482                                      | -0.200                                        |
| Air temp Max(°C)                   | -0.536                                      | -1.000                                        |
| Air temp Min (°C)                  | <b>-0.764</b>                               | -0.400                                        |
| Sea level pressure (hPa)           | 0.309                                       | 0.000                                         |
| Wind Max (km/h)                    | 0.074                                       | -0.400                                        |
| Wind Direction (°)                 | -0.535                                      | -0.632                                        |
| Day Length (h)                     | <b>0.793</b>                                | 0.632                                         |
| Sun hour                           | 0.722                                       | 0.632                                         |
| pH                                 | -0.679                                      | -0.400                                        |
| Salinity (g/L)                     | 0.112                                       | 0.316                                         |
| NO <sub>2</sub> <sup>-</sup> (μM)  | 0.000                                       | 0.400                                         |
| NO <sub>3</sub> <sup>-</sup> (μM)  | -0.143                                      | 0.400                                         |
| NH <sub>4</sub> <sup>+</sup> (μM)  | 0.214                                       | 0.200                                         |
| PO <sub>4</sub> <sup>3-</sup> (μM) | 0.703                                       | 0.800                                         |
| Silicates (μM)                     | 0.500                                       | 0.400                                         |
| DIN (μM)1                          | -0.143                                      | 0.200                                         |



Table S2. Blast analysis on the dominant prokaryotic OTUs (>5% of total sequences in at least one sample) obtained from Sfax (Sidi Mansour, SM) and Carthage (CAR) sites during dinoflagellate blooms.

| Closest cultivated relative retrieved from NCBI nucleotide database |                                                           |                                                                            |              | % of sequences per sample |       |       |       |
|---------------------------------------------------------------------|-----------------------------------------------------------|----------------------------------------------------------------------------|--------------|---------------------------|-------|-------|-------|
| OTUs                                                                | Species (Genbank accession number)                        | Taxonomy (Phylum or class; family)                                         | Identity (%) | SM1                       | SM2   | SM3   | SM4   |
| #2                                                                  | <i>Halochromatium glycolicum</i> (NR_044896)              | <i>Gammaproteobacteria</i> ; <i>Chromatiaceae</i>                          | 96.15        | 20.15                     | 28.99 | 10.35 | 0.91  |
| #5                                                                  | <i>Rhodovulum adriaticum</i> (NR_043404)                  | <i>Alphaproteobacteria</i> ; <i>Rhodobacteraceae</i>                       | 99.53        | 18.83                     | 0.75  | 0.65  | 0.14  |
| #328                                                                | <i>Halochromatium glycolicum</i> (NR_044896)              | <i>Gammaproteobacteria</i> ; <i>Chromatiaceae</i>                          | 96.25        | 8.58                      | 6.25  | 4.32  | 0.28  |
| #8596                                                               | <i>Halochromatium glycolicum</i> (NR_044896)              | <i>Gammaproteobacteria</i> ; <i>Chromatiaceae</i>                          | 96.03        | 3.72                      | 5.84  | 1.96  | 0.18  |
| OTUs                                                                | Species (Genbank accession number)                        | Taxonomy                                                                   | Identity (%) | CAR1                      | CAR2  | CAR3  | CAR4  |
| #1                                                                  | <i>Candidatus Pelagibacter</i> sp. HIMB1321 (LT840186)    | <i>Alphaproteobacteria</i> ; <i>Pelagibacteraceae</i>                      | 99.29        | 12.77                     | 21.43 | 13.54 | 12.95 |
| #7                                                                  | <i>Candidatus Thalassoarchaea mediterranii</i> (KP211789) | <i>Candidatus Thermoplasmatota</i> ; <i>Candidatus Thalassoarchaeaceae</i> | 86.55        | 5.79                      | 2.23  | 4.23  | 5.98  |
| #8                                                                  | <i>Pelagibacterales</i> bacterium LSUCC0245 (KU382423)    | <i>Alphaproteobacteria</i> ; <i>Pelagibacteraceae</i>                      | 99.53        | 3.00                      | 5.73  | 3.30  | 2.96  |
